# Supplementary material for: Ordered anchored cavities at work: a new and rapid SPR-based method for the detection of trace amounts of Cs+
Source: Royal Society of Chemistry journal article supplement (doi:10.1039/b511111k), 2005-01-01
Supplement: b511111k.pdf [file b511111k.pdf]

## Electronic Supplementary Information

### Ordered anchored cavities at work: A new and rapid SPR-based method for the detection of trace amounts of Cs<sup>+</sup>.

Giuseppe Arena,<sup>\*ac</sup> Annalinda Contino,<sup>a</sup> Roberta D'Agata,<sup>a</sup> Carmelo Sgarlata<sup>a</sup> and Giuseppe Spoto<sup>\*abc</sup>

<sup>a</sup> Dipartimento di Scienze Chimiche, Università di Catania, Viale Andrea Doria 6, 95125, Catania, Italy. E-mail: [garena@unict.it](mailto:garena@unict.it); [gspoto@unict.it](mailto:gspoto@unict.it)

<sup>b</sup> Istituto di Biostrutture e Bioimmagini - Sezione di Catania, C.N.R., c/o Dipartimento di Scienze Chimiche, Università di Catania, Viale A. Doria 6, 95125 Catania, Italy

<sup>c</sup> I.N.C.A., Analytical Research Unit, c/o Dipartimento di Scienze Chimiche, Università di Catania, Viale Andrea Doria 6, 95125, Catania, Italy

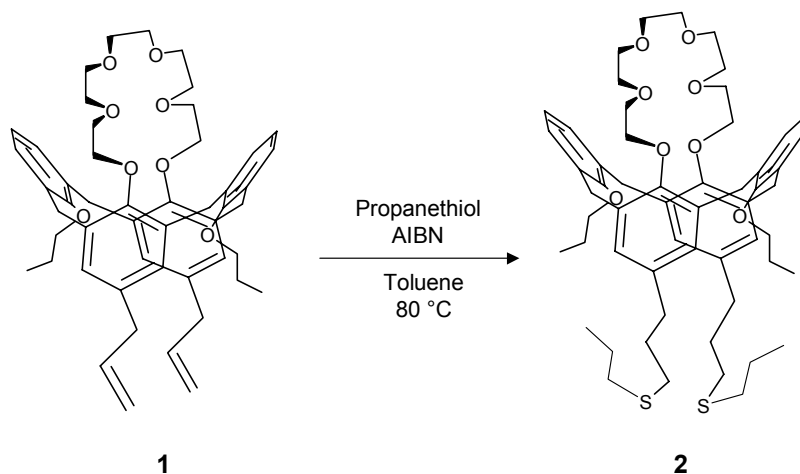

#### 25,27-Bis(propoxy)-5,17-bis[3-(propylsulfanyl)propyl]calix[4]arene-crown-6 1,3-alternate

A solution of **1**<sup>1</sup> (0.30 g, 0.38 mmol), propanethiol (0.60 g, 7.90 mmol) and AIBN (0.10 g) in anhydrous toluene (5 ml) was heated at 80 °C under nitrogen for 48 hours.<sup>2</sup> The solvent was removed under reduced pressure and the residue purified by column chromatography (SiO<sub>2</sub>; *n*-hexane:EtOAc 1:1) to afford pure product **2** as a solid (0.25 g, 70%). <sup>1</sup>H NMR (CDCl<sub>3</sub>, 500 MHz): δ 7.07 (d, 4H, Ar-H<sub>meta</sub>), 6.82 (s, 4H, Ar-H<sub>meta</sub>), 6.82 (t, 2H, Ar-H<sub>para</sub>), 3.74 (s, 8H, ArCH<sub>2</sub>Ar), 3.70-

3.32 (m, 24H,  $\text{CH}_{2\text{crown}}$  and  $\text{OCH}_2\text{CH}_2\text{CH}_3$ ), 2.53 (m, 12H,  $\text{CH}_2\text{SCH}_2$  and  $\text{ArCH}_2\text{CH}_2\text{R}$ ), 1.85 (m, 4H,  $\text{ArCH}_2\text{CH}_2\text{CH}_2\text{S}$ ), 1.62 (m, 4H,  $\text{SCH}_2\text{CH}_2\text{CH}_3$ ), 1.28 (m, 4H,  $\text{OCH}_2\text{CH}_2\text{CH}_3$ ), 0.98 (t, 6H,  $\text{SCH}_2\text{CH}_2\text{CH}_3$ ), 0.75 (t, 6H,  $\text{OCH}_2\text{CH}_2\text{CH}_3$ ). MS (ESI):  $m/z$  944 ( $\text{M}+1$ )<sup>+</sup>. Anal. Calcd. for  $\text{C}_{56}\text{H}_{78}\text{O}_8\text{S}_2$ : 71.30% C, 8.33% H, 13.57% O, 6.80% S. Found: 71.07% C, 8.30% H, 6.78% S.

## References

- 1 G. Arena, A. Casnati, A. Contino, L. Mirone, D. Sciotto and R. Ungano, *Chem. Commun.*, 1996, 2277.
- 2 Y. Gafni, H. Weizman, J. Libman, A. Shanzer and I. Rubinstein, *Chem. Eur. J.*, 1996, **2**, 759.
